# Supplementary material for: Combination of Parenteral Amino Acid Infusion and Intermittent Loading Exercise Ameliorates Progression of Postoperative Sarcopenia in Rat Model
Source: MDPI journal article supplement (doi:10.3390/nu16081218), 2024-04-19
Supplement: s1 [file s1]

## Supplementary Material

**Supplementary Table S1. Hindlimb skeletal muscle mass.**

|                           | Normal |   |       | AA (-) |   |       | AA (+) |       |   | AA (-)-Exc |         |       | AA (+)-Exc |       |         |
|---------------------------|--------|---|-------|--------|---|-------|--------|-------|---|------------|---------|-------|------------|-------|---------|
| Soleus muscle mass (g)    | 0.081  | ± | 0.008 | 0.057  | ± | 0.005 | ***, a | 0.060 | ± | 0.006      | ***, ab | 0.065 | ±          | 0.005 | ***, b  |
| EDL muscle mass (g)       | 0.091  | ± | 0.005 | 0.080  | ± | 0.007 | ***    | 0.085 | ± | 0.004      | *       | 0.085 | ±          | 0.004 | *       |
| Plantaris muscle mass (g) | 0.191  | ± | 0.011 | 0.149  | ± | 0.005 | ***    | 0.155 | ± | 0.009      | ***     | 0.155 | ±          | 0.011 | ***     |
| TA muscle mass (g)        | 0.344  | ± | 0.021 | 0.288  | ± | 0.010 | ***, a | 0.302 | ± | 0.018      | ***, ab | 0.295 | ±          | 0.018 | ***, ab |

EDL: extensor digitorum longus; TA: tibialis anterior.

Data are means ± SDs (n=9-10 per group). \*  $p < 0.05$ , \*\*\*  $p < 0.001$ , compared to Normal group by Dunnett type multiple comparison tests among all groups. Different letters indicate significant differences among the postoperative sarcopenic rats in AA (-), AA (+), AA (-)-Exc, and AA (+)-Exc groups by Tukey type multiple comparison tests ( $p < 0.05$ ).

**Supplementary Table S2. Individual plasma amino acid concentrations (nmol/mL).**

|               | Normal |   |       | AA (-) |   |      | AA (+) |       |   | AA (-)-Exc |        |       | AA (+)-Exc |      |        |       |   |      |         |
|---------------|--------|---|-------|--------|---|------|--------|-------|---|------------|--------|-------|------------|------|--------|-------|---|------|---------|
| Isoleucine    | 105.9  | ± | 21.1  | 67.9   | ± | 7.0  | ***, a | 100.1 | ± | 7.6        | b      | 64.4  | ±          | 7.4  | ***, a | 95.1  | ± | 8.2  | b       |
| Threonine     | 281.3  | ± | 41.7  | 267.7  | ± | 24.4 | a      | 336.5 | ± | 26.8       | ***, b | 264.6 | ±          | 19.3 | a      | 337.8 | ± | 32.1 | ***, b  |
| Tryptophan    | 96.6   | ± | 10.0  | 81.5   | ± | 7.1  | ***, a | 108.6 | ± | 3.8        | **, b  | 78.9  | ±          | 5.2  | ***, a | 110.7 | ± | 7.1  | ***, b  |
| Valine        | 252.5  | ± | 58.7  | 148.9  | ± | 11.1 | ***, a | 239.5 | ± | 18.3       | b      | 140.5 | ±          | 14.0 | ***, a | 223.2 | ± | 16.2 | b       |
| Histidine     | 79.4   | ± | 8.6   | 81.6   | ± | 4.2  | a      | 83.4  | ± | 5.2        | a      | 72.2  | ±          | 3.9  | b      | 78.6  | ± | 3.3  | a       |
| Phenylalanine | 55.1   | ± | 2.9   | 60.3   | ± | 2.7  | ac     | 72.0  | ± | 4.3        | ***, b | 59.2  | ±          | 10.0 | a      | 68.5  | ± | 3.2  | ***, bc |
| Methionine    | 43.9   | ± | 3.9   | 50.5   | ± | 4.4  | a      | 62.7  | ± | 3.3        | ***, b | 50.0  | ±          | 8.4  | a      | 58.9  | ± | 2.7  | ***, ab |
| Lysine        | 527.2  | ± | 38.5  | 483.9  | ± | 31.5 | *, a   | 568.4 | ± | 33.8       | *, b   | 468.0 | ±          | 34.9 | **, a  | 539.5 | ± | 31.8 | b       |
| Leucine       | 166.2  | ± | 25.4  | 121.9  | ± | 8.3  | *, a   | 186.1 | ± | 15.5       | b      | 114.0 | ±          | 11.6 | **, a  | 171.1 | ± | 14.4 | b       |
| Asparagine    | 80.1   | ± | 12.4  | 62.9   | ± | 5.8  | a      | 38.6  | ± | 2.6        | ***, b | 57.6  | ±          | 4.7  | c      | 37.1  | ± | 2.9  | ***, b  |
| Aspartic acid | 11.9   | ± | 4.8   | 11.0   | ± | 1.2  | a      | 7.1   | ± | 0.7        | **, b  | 11.1  | ±          | 1.8  | a      | 7.2   | ± | 0.6  | **, b   |
| Alanine       | 762.5  | ± | 118.2 | 714.3  | ± | 65.7 | a      | 545.8 | ± | 48.9       | ***, b | 629.7 | ±          | 74.0 | c      | 493.1 | ± | 44.8 | ***, b  |
| Arginine      | 131.6  | ± | 14.1  | 157.2  | ± | 17.5 | *, a   | 242.8 | ± | 24.3       | ***, b | 145.0 | ±          | 11.6 | a      | 227.9 | ± | 18.7 | ***, b  |
| Glycine       | 153.3  | ± | 24.5  | 234.3  | ± | 24.2 | ***    | 220.6 | ± | 10.8       | ***    | 235.5 | ±          | 27.3 | ***    | 217.2 | ± | 17.2 | ***     |
| Glutamine     | 632.1  | ± | 40.0  | 870.0  | ± | 64.2 | *, a   | 520.7 | ± | 25.3       | b      | 808.7 | ±          | 80.6 | a      | 511.1 | ± | 35.3 | *, b    |
| Glutamic acid | 82.3   | ± | 11.1  | 83.8   | ± | 9.5  | a      | 59.9  | ± | 3.9        | ***, b | 83.6  | ±          | 7.9  | a      | 62.0  | ± | 6.5  | ***, b  |
| Cystine       | 32.5   | ± | 4.1   | 30.8   | ± | 4.4  |        | 35.1  | ± | 3.3        |        | 31.9  | ±          | 5.8  |        | 33.1  | ± | 4.0  |         |
| Serine        | 297.4  | ± | 24.3  | 422.5  | ± | 32.3 | **, a  | 290.3 | ± | 14.1       | b      | 391.7 | ±          | 43.3 | *, a   | 282.2 | ± | 19.7 | b       |
| Tyrosine      | 112.3  | ± | 23.5  | 89.6   | ± | 10.8 | a      | 80.9  | ± | 7.2        | **, ab | 79.8  | ±          | 10.3 | **, ab | 70.7  | ± | 6.6  | ***, b  |
| Proline       | 284.1  | ± | 97.3  | 149.9  | ± | 12.7 | **, a  | 163.9 | ± | 9.7        | b      | 145.6 | ±          | 10.9 | ***, a | 155.6 | ± | 9.8  | *, ab   |

Data are means  $\pm$  SDs (n=9-10 per group). \*  $p < 0.05$ , \*\*  $p < 0.01$ , \*\*\*  $p < 0.001$ , compared to Normal group by Dunnett type multiple comparison tests among all groups. Different letters indicate significant differences among the postoperative sarcopenic rats in AA (-), AA (+), AA (-)-Exc, and AA (+)-Exc groups by Tukey type multiple comparison tests ( $p < 0.05$ ).
